# Supplementary material for: Microplastics in the Danube River and Its Main Tributaries—Ingestion by Freshwater Macroinvertebrates
Source: MDPI journal article supplement (doi:10.3390/w16070962), 2024-03-27
Supplement: s1 [file s1]

Table S1. List of sampling sites with codes and information for each site.

| <b>Site code</b> | <b>Name</b>                              | <b>Country</b> | <b>Latitude</b> | <b>Longitude</b> | <b>River</b>     | <b>Rkm*</b> |
|------------------|------------------------------------------|----------------|-----------------|------------------|------------------|-------------|
| <b>JDS4-3</b>    | Above Klösterl -<br>Kelheim              | DE             | 48.91761        | 11.865727        | Danube           | 2415        |
| <b>JDS4-4</b>    | Niederalteich -<br>Mühlau                | DE             | 48.77453        | 13.00914         | Danube           | 2258        |
| <b>JDS4-9</b>    | Klosterneuburg                           | AT             | 48.33012        | 16.32987         | Danube           | 1942        |
| <b>JDS4-17</b>   | Vének                                    | HU             | 47.736167       | 17.781583        | Danube           | 0.1         |
| <b>JDS4-20</b>   | Kamenica                                 | SK             | 47.82608        | 18.72334         | Hron             | 1.7         |
| <b>JDS4-22</b>   | Szob                                     | HU/SK          | 47.8134         | 18.863233        | Danube           | 1707        |
| <b>JDS4-23</b>   | Budapest upstream -<br>Megyeri Bridge    | HU             | 47.616033       | 19.101767        | Danube           | 1660        |
| <b>JDS4-24</b>   | Budapest downstream<br>- M0 bridge       | HU             | 47.3883         | 19.004083        | Danube           | 1630        |
| <b>JDS4-27</b>   | Paks                                     | HU             | 46.633733       | 18.880417        | Danube           | 1532        |
| <b>JDS4-29</b>   | Hercegszanto / Batina<br>/ Bezdan        | HU/HR/RS       | 45.91455        | 18.805933        | Danube           | 1434        |
| <b>JDS4-31</b>   | Ilok / Backa Palanka                     | HR/RS          | 45.231583       | 19.3606          | Danube           | 1300        |
| <b>JDS4-32</b>   | Tiszasziget / Martonoš                   | HU/RS          | 46.18552        | 20.10467         | Tisza            | 163         |
| <b>JDS4-33</b>   | Tisza mouth                              | RS             | 45.147          | 15.692           | Tisza            | 1           |
| <b>JDS4-35</b>   | Jamena                                   | RS/BA          | 44.87828        | 19.08364         | Sava             | 205         |
| <b>JDS4-36</b>   | Sava mouth                               | RS             | 44.793          | 20.396067        | Sava             | 7           |
| <b>JDS4-37</b>   | Downstream Pancevo                       | RS             | 44.814467       | 20.644433        | Danube           | 1151        |
| <b>JDS4-38</b>   | Varvarin                                 | RS             | 43.74           | 21.38            | Velika<br>Morava | 154         |
| <b>JDS4-40</b>   | Banatska Palanka /<br>Bazias             | RS/RO          | 44.8051         | 21.3838          | Danube           | 1073        |
| <b>JDS4-41</b>   | Upstream Timok<br>(Rudujevac /<br>Gruia) | RS/RO          | 44.260917       | 22.684983        | Danube           | 847         |
| <b>JDS4-44</b>   | Iskar mouth                              | BG             | 43.7299         | 24.443817        | Iskar            | 0.3         |
| <b>JDS4-45</b>   | Jantra mouth                             | BG             | 43.637483       | 25.569867        | Jantra           | 1           |
| <b>JDS4-47</b>   | Downstream<br>Ruse/Giurgiu<br>(Marten)   | BG/RO          | 43.91083        | 26.06696         | Danube           | 488         |
| <b>JDS4-48</b>   | Chiciu/Silistra                          | RO/BG          | 44.13693        | 27.05112         | Danube           | 375         |

\*Rkm stands for river kilometer.

Table S2. Number of *C. fluminea* specimens per sample and analysed particles using micro-ATR-FTIR spectroscopy.

| Site code* | Number of specimens | FTIR Samples | Polymer type                         |
|------------|---------------------|--------------|--------------------------------------|
| JDS4-3     | 10                  | JDS4-3_1     | Cellophane                           |
|            |                     | JDS4-3_2     | -**                                  |
|            |                     | JDS4-3_3     | Polycarbonate                        |
|            |                     | JDS4-3_4     | Polycarbonate                        |
| JDS4-4-    | 2                   |              |                                      |
| JDS4-9     | 10                  | JDS4-9_1     | -**                                  |
|            |                     | JDS4-9_2     | -**                                  |
|            |                     | JDS4-9_3     | Polycarbonate                        |
| JDS4-17    | 10                  | JDS4-17_1    | Cellophane                           |
|            |                     | JDS4-17_2    | Polypropylene-polyethylene copolymer |
|            |                     | JDS4-17_4    | Polyethylene Terephthalate (PET)     |
| JDS4-20    | 5                   | JDS4-20_1    | Polycarbonate                        |
|            |                     | JDS4-20_2    | Polycarbonate                        |
|            |                     | JDS4-20_3    | Polycarbonate                        |
| JDS4-22    | 10                  |              |                                      |
| JDS4-23    | 9                   |              |                                      |
| JDS4-24    | 10                  | JDS4-24_1    | Polyethylene Terephthalate (PET)     |
|            |                     | JDS4-24_2    | Polyethylene Terephthalate (PET)     |
|            |                     | JDS4-24_3    | Polypropylene-polyethylene copolymer |
|            |                     | JDS4-24_4    | Polyethylene Terephthalate (PET)     |
| JDS4-27    | 10                  | JDS4-27_1    | -**                                  |
|            |                     | JDS4-27_2    | Polypropylene-polyethylene copolymer |
|            |                     | JDS4-27_3    | Polyethylene Terephthalate (PET)     |
|            |                     | JDS4-27_4    | Polycarbonate                        |
| JDS4-29    | 10                  | JDS4-29_1    | -**                                  |
|            |                     | JDS4-29_2    | Polycarbonate                        |
|            |                     | JDS4-29_3    | Nylon (Polyamide)                    |
|            |                     | JDS4-29_4    | Polyethylene Terephthalate (PET)     |
| JDS4-31    | 10                  | JDS4-31_1    | Polyethylene Terephthalate (PET)     |
|            |                     | JDS4-31_2    | Polyethylene Terephthalate (PET)     |
|            |                     | JDS4-31_3    | 5,8,11,14,17-eicosapentaenoic acid   |
| JDS4-32    | 10                  |              |                                      |
| JDS4-33    | 10                  |              |                                      |
| JDS4-35    | 10                  | JDS4-35_1    | Polyethylene Terephthalate (PET)     |
|            |                     | JDS4-35_2    | Polyethylene Terephthalate (PET)     |
|            |                     | JDS4-35_3    | Polyethylene Terephthalate (PET)     |
| JDS4-36    | 10                  |              |                                      |

|                |    |           |                                  |
|----------------|----|-----------|----------------------------------|
| <b>JDS4-37</b> | 10 | JDS4-37_1 | Polyethylene Terephthalate (PET) |
|                |    | JDS4-37_2 | Polyethylene Terephthalate (PET) |
|                |    | JDS4-37_3 | Polyethylene Terephthalate (PET) |
| <b>JDS4-38</b> | 10 |           |                                  |
| <b>JDS4-40</b> | 10 |           |                                  |
| <b>JDS4-41</b> | 10 | JDS4-41_1 | Polyethylene Terephthalate (PET) |
|                |    | JDS4-41_2 | Polyethylene Terephthalate (PET) |
|                |    | JDS4-41_3 | Polyethylene Terephthalate (PET) |
| <b>JDS4-44</b> | 10 | JDS4-44_1 | Polycarbonate                    |
|                |    | JDS4-44_2 | -**                              |
|                |    | JDS4-44_3 | Polycarbonate + inorganic        |
| <b>JDS4-45</b> | 10 |           |                                  |
| <b>JDS4-47</b> | 10 | JDS4-47_1 | Polyethylene Terephthalate (PET) |
|                |    | JDS4-47_2 | Polycarbonate                    |
|                |    | JDS4-47_3 | Polycarbonate                    |
| <b>JDS4-48</b> | 10 | JDS4-48_1 | Polyethylene Terephthalate (PET) |
|                |    | JDS4-48_2 | Polyethylene Terephthalate (PET) |
|                |    | JDS4-48_3 | Polyethylene Terephthalate (PET) |

\*Site codes are described in Supplementary Table S1.

\*\* Particles were identified as inorganic material.

Table S3. Description of the analyzed particles.

| <b>Polymer type</b>                         | <b>Subcategory</b> | <b>Number of particles</b> | <b>Shape</b>                    | <b>Average particle size (mm)</b> | <b>SD</b> |
|---------------------------------------------|--------------------|----------------------------|---------------------------------|-----------------------------------|-----------|
| <b>Cellophane</b>                           | transparent        | 2                          | irregular (film)                | 0.34                              | 0.14      |
| <b>Polycarbonate</b>                        | black              | 3                          | triangular                      | 0.11                              | 0.05      |
|                                             | red                | 2                          | irregular                       | 0.34                              | 0.27      |
|                                             | blue               | 4                          | Square and irregular film/ foil | 0.095                             | 0.03      |
|                                             | transparent        | 2                          | irregular (film)                | 0.59                              | 0.04      |
|                                             | green              | 1                          | irregular                       | 0.18                              |           |
| <b>Polyethylene Terephthalate (PET)</b>     | transparent        | 21                         | irregular (film)                | 0.82                              | 0.33      |
| <b>Polypropylene-polyethylene copolymer</b> | transparent        | 3                          | irregular (film)                | 0.51                              | 0.17      |
| <b>Nylon (Polyamide)</b>                    | transparent        | 1                          | irregular (film)                | 0.28                              |           |
| <b>-</b>                                    | brown              | 1                          | cubic                           | 0.26                              |           |
|                                             | white              | 1                          | cubic                           | 0.81                              |           |
|                                             | red                | 1                          | irregular                       | 0.32                              |           |
|                                             | transparent        | 3                          | irregular                       | 0.24                              | 0.08      |
| <b>5,8,11,14,17-eicosapentaenoic acid</b>   | transparent        | 1                          | cubic                           | 0.6                               |           |
